Santos Jr, Hudson

## **Discrimination Exposure and DNA Methylation of Stress-Related Genes in Latina Mothers**

Hudson P Santos Jr,<sup>1,\*</sup> Benjamin C Nephew,<sup>2</sup> Arjun Bhattacharya,<sup>3</sup> Xianming Tan,<sup>3</sup> Laura Smith,<sup>4</sup> Reema Alyamani,<sup>4</sup> Elizabeth M Martin,<sup>5</sup> Krista Perreira,<sup>6</sup> Rebecca C Fry,<sup>5</sup> Christopher Murgatroyd<sup>4</sup>

<sup>1</sup> School of Nursing, University of North Carolina at Chapel Hill, North Carolina, United States

<sup>2</sup> Department of Biomedical Sciences, Tufts University Cummings School of Veterinary Medicine, Massachusetts, United States

<sup>3</sup> Department of Biostatistics, Gillings School of Global Public Health, University of North Carolina at Chapel Hill, North Carolina, United States

<sup>4</sup> School of Healthcare Science, Manchester Metropolitan University, Manchester, England

<sup>5</sup> Department of Environmental Sciences and Engineering, Gillings School of Global Public Health, University of North Carolina at Chapel Hill, North Carolina, United States

<sup>6</sup> Department of Social Medicine, School of Medicine, University of North Carolina at Chapel Hill, North Carolina, United States

### **\*Corresponding author:**

Hudson P Santos Jr

120 N. Medical Drive, Carrington Hall, Campus Box #7460, Chapel Hill, NC 27599-7460.

Email: [hsantos@unc.edu](mailto:hsantos@unc.edu)

Phone: +1 (919) 966-9483

**Conflict of interest:** None.

**Contributors:** Authors HS, BN and CM designed the study. Authors HS, BN, LS, RA, and CM were involved in data collection, processing and/or quality assurance. Authors AB, XT, and HS performed the statistical analyses and/or made tables. All authors contributed to the interpretation of the results. Author HS wrote the first draft of the manuscript. All authors contributed to and have approved the final manuscript.

Santos Jr, Hudson

**Acknowledgements:** We would to thank our research assistants, Erika Campos and Kathia Pena, for their effort in the recruitment and retention of participants in this study.

**Role of funding source:** This work was supported by the NIH Clinical and Translational Science Award, North Carolina Translational & Clinical Sciences Institute (UL1TR001111; pilot grant #550KR131619) and the University of North Carolina at Chapel Hill School of Nursing. The content is solely the responsibility of the authors and does not represent the official views of the funding agencies.

Santos Jr, Hudson

## Abstract

Latina mothers, who have the highest fertility rate among all ethnic groups in the US, are often exposed to discrimination. The biological impacts of this discrimination are unknown. This study is the first to explore the relationship between discrimination, as a psychosocial stressor, and DNA methylation of stress regulatory genes in Latinas. Our sample was Latina women (n = 147) with a mean age of 27.6 years who were assessed at 24-32 weeks' gestation (T1) and 4-6 weeks postpartum (T2). Blood was collected at T1, and the Everyday Discrimination Scale (EDS) was administered at T1 and T2. DNA Methylation at candidate gene regions was determined by bisulphite pyrosequencing. Associations between EDS and DNA methylation were assessed via zero-inflated Poisson models, adjusting for covariates and multiple-test comparisons. Discrimination was associated with decreased methylation at CpG sites within the glucocorticoid receptor (*NR3C1*) and brain-derived neurotrophic factor (*BDNF*) genes that were consistent over time. In addition, discrimination associated with decreased methylation of a CpG in the glucocorticoid binding protein (*FKBP5*) at T1 but not at T2. This study underscores the complex biological pathway associations between discrimination and epigenetic modification in Latina women in the US that warrant further investigation to better understand the genetic and psychopathological impact of discrimination on Latino mothers and their families.

**Keywords:** discrimination; Latina; women's health; DNA methylation; stress biology; stress exposure.

Santos Jr, Hudson

## 1. Introduction

The accumulation of stress over the lifespan can contribute to biological vulnerability and directly affect health outcomes for mothers and their children. Latina women, who have the highest fertility rate among all ethnic groups and represent the largest minority group in the US, are exposed to a multitude of stressful events and sociocultural factors, including discrimination. For Latinas living in the US, the prevalence of depression during pregnancy or postpartum, which is highly correlated with stress and social adversity, is substantially higher (up to ~50%) than that of the general US population (~15%) (Halbreich and Karkun, 2006; Liu and Tronick, 2014). Extant research in Latinas has largely focused on varied levels of exposure to risk and protective factors in the perinatal period including socio-determinants of health (e.g., socioeconomic background), prenatal care, social support, and stress. These factors, however, do not adequately account for all of the noted disparities in perinatal outcomes (Guintivano et al., 2017).

Discrimination has been defined as differential treatment based on: (1) race that disadvantages a racial/ethnic group and/or (2) inadequately justified factors other than race/ethnicity that disadvantages a racial/ethnic group (National Research Council, 2004). A contributing factor in health disparities and social inequality, discrimination has been associated with several adverse physical and mental health outcomes in minority groups (Wallace et al., 2016; Williams and Mohammed, 2009). A recent meta-analysis of 150 studies demonstrated a statistically significant effect size of racial discrimination on health, with the largest effect on mental health ( $r = .20$ , 95% CI: .17, .24) (Carter et al., 2017). Earlier meta-analyses found similar associations (Lee and Ahn, 2012). Among Latinos, discriminatory experiences are associated with decreased self-esteem and emotional stress, increased anxiety and depressive symptoms, and social isolation (Ayón, 2015). A recent nationally representative survey suggested that one in three Latinos report discrimination based on ethnicity, and one in five report that they have avoided seeking medical care or calling police authorities because they were concerned that they or a family member would experience discrimination (NPR et al., 2017). Overall, these studies

Santos Jr, Hudson

suggest that Latinos face discrimination across the US. Moreover, in the current political climate, discrimination against Latinos may be increasing (Almeida et al., 2016).

Several mechanisms for the adverse effects of discrimination on mental health have been described. This study focuses on discrimination as a psychosocial stressor that can result in neuroendocrine associated dysregulation, via DNA methylation, of stress regulatory genes which can ultimately have deleterious effects on mental health outcomes (Berger and Sarnyai, 2015). DNA methylation is the addition of a methyl group, usually to cytosines within CpG dinucleotides, which when located in promoter regions generally represses gene expression. Stress reactivity has been hypothesized to mediate the impact of the social environment on health. Exposure to various environmental stressors can alter the expression of hypothalamic–pituitary–adrenal axis (HPA) associated genes, and social adversity has potent effects on stress-regulating pathways, resulting in altered stress responsivity. Dysregulation of the stress response, notably expression of HPA genes through epigenetic modifications such as DNA methylation, is likely to contribute to stress-related health disparities and provide a link between the stressful social environment and disease development (Mitchell et al., 2016; Szyf, 2013).

Little is known about how perceived racial discrimination influences DNA methylation patterning. A recent study reported an inverse relationship between perceived racial discrimination and DNA methylation at seven CpG sites (six genes related to tumor suppression protein-coding) in African-American women enrolled in a blood pressure study (Mendoza et al., 2018). To our knowledge, the effects of discrimination on DNA methylation in Latinas is unknown. However, studies have reported dysregulation of the stress response in depressed mothers (Glynn et al., 2013), including Latinas (Lara-Cinisomo et al., 2017).

Two genes critically involved in the regulation of the stress response are the glucocorticoid receptor gene (*NR3C1*) (Herman et al., 2012) and the glucocorticoid receptor chaperone protein gene *FKBP5* (Zannas et al., 2015). DNA methylation at key specific CpG sites within *NR3C1* exon 1-F promoter and two key CpGs within intron 7 of *FKBP5* have been associated with early adversity (Palma-Gudiel et al., 2015). In addition, stress induced neuroplasticity associated with altered HPA function is

Santos Jr, Hudson

mediated by functional interactions between glucocorticoids and brain-derived neurotrophic factor (*BDNF*) (Numakawa et al., 2017) where methylation at a key promoter region IV has been linked to environmental stressors in humans and rodent models (Mitchellmore and Gede, 2014). Based on this integrated literature and its specific connection to mental health, we hypothesize that one biological mechanism for these adverse effects is neuroendocrine-associated dysregulation via epigenetic programming of stress regulatory genes. The current study investigated associations between methylation at specific CpG sites within the *NR3C1*, *FKBP5*, and *BDNF* genes and perceived discrimination in a population of Latina mothers.

## 2. Material and Methods

### 2.1 Participants

Healthy pregnant Latina women (n = 150) living in North Carolina (NC) were enrolled in the study between May 2016 to March 2017. Eligibility criteria included: (1) 18-45 years old, (2) Spanish- or English-speaking, (3) carrying a singleton pregnancy, (4) available for follow-up at 6 weeks postpartum. Exclusion criteria were: (1) currently experiencing severe depressive symptoms as determined by psychiatric interview, (2) history of psychotic or bipolar disorder, or receiving psychotropic therapy, (3) substance dependence in the last two years, (4) fetal anomaly, or (5) life-threatening conditions. These exclusions were adopted to avoid confounders and control for severe mood symptoms with onset before the study time frame. Data collection was completed in English or Spanish, depending on participants preference, by a trained research assistant at the prenatal visit at 24-32-week gestation (T1) and at 4-6 week postpartum (T2). The Institutional Review Board of the University of North Carolina at Chapel Hill approved this study (#15-3027).

### 2.2 Measures

#### 2.2.1 Perceived Discrimination

The Everyday Discrimination Scale (EDS), a nine-item questionnaire, was used to measure routine, day-to-day experiences of discrimination at T1 and T2. The stem question is: “In your day-to-day

Santos Jr, Hudson

life, how often do any of the following things happen to you?” Sample items include: “You are treated with less courtesy than other people are,” “People act as if they think you are dishonest” and, “You are called names or insulted.” The EDS is a widely used measure of subjective experiences of discrimination (Williams et al., 1997). It correlates with measures of institutional racial discrimination and interpersonal prejudice (Krieger et al., 2005) and does not prime the subjects to think about race, which eliminates cues to prejudice prior to responding to the questions (Deitch et al., 2003). The 9-item Likert response scale for frequencies ranged from 0 (“never”) to 5 (“almost every day”). We constructed a mean summary that ranged from 0 to 5, with a higher score indicating a higher frequency of perceived discrimination. Cronbach’s alpha for item consistence for the EDS in our sample was 0.86 for T1 and 0.89 for T2.

### 2.2.2 DNA Methylation

To minimize variability in stress, the study blood draw was incorporated into the routine prenatal blood draw at T1 followed by self-report measures. A 6 ml blood sample was drawn from a peripheral vein into a chilled EDTA-vacutainer, placed immediately on ice and processed. The buffy coat was separated by centrifugation, frozen on dry ice, and stored at -80°C. DNA methylation levels were determined by bisulphite pyrosequencing. Briefly, 1 µg DNA were treated using the EpiTect Bisulfite Kit (Qiagen) and candidate-gene regions containing specific CpGs within *FKBP5* intron 7 (Paquette et al., 2014), *BDNF* untranslated exon IV (Perroud et al., 2013), and *NR3C1* exon 1F (Murgatroyd et al., 2015) were amplified using the PyroMark PCR Kit. See Table 1 for primer sequences, locations of regions, and PCR conditions. We focused only on specific CpGs supported by previous literature to maintain statistical power and reduce effects of multiple analyses. Single-stranded biotinylated product was purified by mixing 10 µl of the amplification mixture, 2 µl of streptavidin sepharose HP (Amersham Biosciences), and 40 µl of binding buffer. The sepharose beads containing the immobilized biotinylated product were purified, washed, and denatured in 0.2 mol/l NaOH and washed again using the Pyrosequencing Vacuum Prep Tool (Qiagen). The biotinylated DNA was resuspended in 12 µl of annealing buffer containing 0.3 µmol/l pyrosequencing primer (see Table 1 for primer sequences) and quantified by pyrosequencing using

Santos Jr, Hudson

the PSQ 24MA system with the PyroMark Q24 Advanced CpG Reagents (Qiagen). The percentage methylation for each of the CpG sites was calculated using Pyro Q-CpG software (Qiagen). All analyses represent the average of 3 separate assays.

### *2.2.3 Covariates*

Maternal age, marital status, education, household income, ethnicity, years living in the US, national origin (US or non-US-born) and sex of the infant were collected through questionnaires at T1. Because psychological distress is highly prevalent in Latina mothers and related to both discrimination and DNA methylation of stress-related genes (Berger and Sarnyai, 2015), we used the Inventory of Depression and Anxiety Symptoms - General Depression Scale (IDAS-GD) (Watson et al., 2012) which comprehensively assess depressive symptoms to account for negative mood at T1 and T2; higher IDAS-GD scores indicates more severe symptoms. Typical IDAS-GD scores are 32.4 and 37.4 for control and high-risk women, respectively, and between 44.6 and 57.3 for depressed women (Schiller et al., 2013; Segre et al., 2015). Cronbach's alpha for item consistence for the IDAS-GD in our sample was  $> 0.78$  for T1 and T2.

### *2.2.4 Statistical Analysis*

We modelled the composite EDS scores with zero-inflated Poisson (ZIP) models (Lambert, 1992) because of high frequency of zero counts in this score. ZIP regression was used to model count data that has an excess of zero counts and assumes that the excess zeros can be modelled separately from the count values. Specifically, the ZIP regression model has two parts, a Poisson regression models for the counts, and a logistic model for excess of zeroes. In our study, the logistic model has only one covariate, IDAS-GD, as it was the only covariate associated with the excess zero process. We examined the association between CpG methylation and EDS by including specific CpG's in the Poisson model for counts, controlling for the variables of age, sex of baby, marital status, education, total income, ethnicity, years living in the US, and IDAS-GD score. We used the Vuong test (Vuong, 1989) to compare the ZIP with an ordinary Poisson regression model in terms of model fitness. We used a post-hoc adjustment for multiple comparisons via the Benjamini-Hochberg procedure and controlled for the false discovery rate of

Santos Jr, Hudson

0.05. Only complete cases of covariates and control variables were considered ( $n = 147$ ). Model goodness of fit was measured via McFadden pseudo- $R^2$ . McFadden pseudo- $R^2$  measures the proportion of the variance in the outcome explained by the covariates, much like the coefficient of determination in an ordinary least squares (OLS) model. Instead of using sums of squared errors to construct  $R^2$ , as in an OLS model, we used the log-likelihoods of the full and null models. We present Poisson model-based risk ratios associated with each CpG site and respective  $p$ -values, adjusted post-hoc via the Benjamini-Hochberg procedure, and McFadden pseudo- $R^2$  values. To facilitate replication of this study, the R analytical code is available in Appendix A and the data can be downloaded from this link:

<https://osf.io/am58g/>.

### 2.2.5 Missing Data

A monotone missingness pattern was observed in follow-up (T2) IDAS-GD, and missing observations were multiply imputed with chained equations via predictive mean matching (White et al., 2011). Three observations with missing covariates were dropped from the study to avoid inducing bias due to imputation of both outcomes and covariates.

## 3. Results

Table 2 summarizes the demographics of the cohort of 150 Latina women who were included in this analysis. Participants had a mean age of 27.6 years. Most participants were married or living with a partner (74.2%), had an education level of high school or less (85.0%), and had a yearly household income of  $\leq 25,000$  US dollars (79.6%). The majority were non-US born (83.7%) and had been living in the US for a mean of 12 years. In terms of depression symptoms from the IDAS-GD, the mean score was 29.87. In our sample, 30.4% of the women reported have experienced ethnicity-based discrimination at some point in their lives. For the EDS outcome, the mean scores were 0.34 (SD 0.56) and 0.22 (SD 0.46) at T1 and T2, respectively. The most frequent reported reasons for experiencing discrimination were race and ancestry at both time points (Table 3).

Santos Jr, Hudson

Vuong tests to compare non-nested models indicated that ZIP is a better fit to our data than ordinary Poisson regression, all with  $p < 0.001$ . Table 4 shows the risk ratios between methylation at CpG site and EDS, estimated from the Poisson model part, controlling for demographic, ethnicity, immigration and mood symptoms variables. At T1, we found significant negative associations between EDS and methylation at CpG sites 1 and 2 of *NR3C1* (RR = 0.85, 0.84 and  $p = 0.008, 0.004$ , respectively). Significant negative associations were also identified at CpG sites 6 and 7 of the *BDNF* promoter (RR = 0.86, 0.92,  $p = 0.004, 0.004$ , respectively). Lastly, a significant negative association at CpG site 1 of *FKBP5* was identified (RR = 0.85,  $p < 0.001$ ). At T1, the covariates indicate that female sex of the baby was associated with decreased EDS risk, while absence of a partner, income greater than US\$40,000, years living in the US, and depressive symptoms were associated with increased EDS risk.

At T2, consistent with T1 findings, the negative associations between EDS and CpG site 2 of *NR3C1* (RR = 0.84,  $p = 0.025$ ) and CpG sites 6 and 7 of *BDNF* (RR = 0.89, 0.92, and  $p = 0.025, 0.025$ , respectively) were still present. The analysis also showed negative associations of EDS with CpG site 5 of *BDNF* (RR = 0.86,  $p = 0.025$ ). The covariates of age and presence of a partner were associated with decreased EDS risk, and income and general depression were associated with increased EDS risk at T2. The complete model results from T1 and T2 are presented in Appendix B, tables B1-B4.

#### 4. Discussion

This is the first study to report associations between blood DNA methylation of stress-related genes (*NR3C1*, *FKBP5*, *BDNF*) and perceived discrimination in Latina women in the US. Exposure to discrimination has established adverse impacts on health. We hypothesized that one biological mechanism for these adverse effects is neuroendocrine-associated dysregulation via epigenetic programming of stress regulatory genes. In our cohort, 30.4% of the women reported having experienced ethnicity-based discrimination at some point in their lives. Via the EDS, women reported low to moderate frequency of discriminatory experience, which is consistent with a previous study (Colen et al., 2018), and related their discrimination experiences mostly to their race and ancestry. We identified several

Santos Jr, Hudson

statistically significant associations, even after accounting for demographic, ethnicity, immigration and mood symptoms covariates. Our findings underscore the specific, robust, and complex biological pathway associations between discrimination and epigenetic modification in Latina women in the US.

Within the *NR3C1* exon 1F, methylation at CpG site 2 was negatively associated with EDS at both T1 and T2 while CpG 1 methylation was negatively associated with EDS at T1. The *NR3C1* exon 1F is a key element in stress response regulation, and the present data suggest that increased EDS is associated with regulatory changes in glucocorticoid-related genes. The fewer associations at T2 may be explained by the endocrine changes during the peripartum period (including elevated cortisol levels) and/or changes in EDS perception due to motherhood and associated improvements in the social environment (decreased exposure to negative social interactions, including discrimination, and increased exposure to social support) which could alter the epigenome at specific sites.

Differences in methylation patterns in the *NR3C1* exon 1F (or Exon 1<sub>7</sub> in rats) in relation to social environment and stress have been reported in a systematic review of 40 articles (27 human and 13 animal studies) (Turecki and Meaney, 2016). In studies focused on psychological distress, human studies (seven in total) reported varied results in terms of *NR3C1* exon 1<sub>7</sub> methylation: one reported increased methylation (Dammann et al., 2011), two reported decreased methylation (Alt et al., 2010; Yehuda et al., 2015), while three reported no change (Alt et al., 2010; Steiger et al., 2013; Yehuda et al., 2013). Similar findings were also reported in early life stress and parental stress studies. For example, in a socioeconomic-matched analysis of children exposed to maltreatment, researchers found decreased methylation in a single CpG (CpG 2, corresponding to our CpG 1) and increased methylation at CpGs 3, 5 and 6 (Romens et al., 2015). Another study found that maternal and paternal experience of the Holocaust were associated with decreased and increased methylation of exon 1F, respectively (Yehuda et al., 2014). A meta-analysis further demonstrated changes at specific CpG 36 (corresponding to our CpG 1) site and prenatal stress in infants supporting the importance of methylation at key CpG sites within *NR3C1* (Palma-Gudiel et al., 2015). Latinas that perceive higher levels of discrimination may not effectively down regulate glucocorticoid levels in response to this type of stress, resulting in both

Santos Jr, Hudson

increased perception and susceptibility to adverse health outcomes. This discrimination exposure could be mediated by both genetic susceptibility and/or exposure to chronic stress. The current *NR3C1* methylation results indicate that changes in glucocorticoid expression may be a potent risk factor and support the investigation of stress-related factors as biomarkers and/or treatment targets for mothers at risk of the adverse effects of discrimination on themselves and their offspring.

Another important modulator of glucocorticoid signaling in response to stress is *FKBP5*, and the data suggest that elevated EDS is associated with increases in both binding protein and glucocorticoid receptor expression. The *FKBP5* and *NR3C1* data together indicate that stress activity/responsivity mediates both pre and postpartum discrimination, but the specific nature of this mediation may vary with time. These HPA-related findings support the hypothesis of increased responsiveness to social stress leading to the accentuated perception of discrimination, where decreased responsiveness is protective. A remarkable potential implication of these data is that discrimination-related stress could induce coordinated epigenetic effects on multiple genes that collectively serve to downregulate stress responsivity, thus acting as a coping mechanism and limiting the perception of discrimination and/or impact of discrimination on a multitude of stress-related etiologies. One consideration in these types of studies is that those who volunteer may tend to be relatively more resilient, less sensitive to EDS, and express fewer depression/anxiety symptoms. Future studies should investigate epigenetic regulation of these stress-related genes in a larger and more heterogenous cohort.

Significant negative associations between EDS and *BDNF* methylation were observed. *BDNF* is a major contributor to neuronal plasticity and there is substantial evidence that *BDNF* expression and neurogenesis are generally reduced following chronic and acute stressors in human and animal studies. The negative association at T1 and T2 (CpGs 6 and 7) and potential increase in *BDNF* in those exposed to higher levels of EDS may be driven by the type of *BDNF* actions associated with post-traumatic stress (Zhang et al., 2016), where increases may consolidate adverse stressful events through neuroplasticity mechanisms resulting in the increased perception of discrimination. It is interesting to note that behavioral

Santos Jr, Hudson

and neural changes observed in mothers who experience a traumatic birth are similar to those found in patients with post-traumatic stress disorder (Yildiz et al., 2017).

A further supposition is whether discrimination might be positively adaptive, in the sense of heightening awareness and attention to the environment. Such components of consciousness have been suggested to influence brain neuroplasticity, activating synaptic flow and changes brain structures and functional organization (Askenasy and Lehmann, 2013). The present data and the BDNF literature indicate the imminent need for long-term prospective studies of the role of BDNF in the etiology of stress-related disorders in Latinas exposed to ethnic discrimination.

Looking at the covariates included in the regression models, we observed that female sex of the baby (T1), age and presence of a partner (T2) all decreased the risk ratios for EDS, while depressive symptoms and higher annual income (T1 and T2), years living in the US and being single (T1) increasing the risk of discrimination. These findings reinforce reports of several risk factors for stress-related disorders and indicate that increased age and partner support may be particularly and specifically protective against the risk of discrimination in the perinatal period. Furthermore, increased risk associated with years living in the US may be due to impaired socio-cultural based resilience in these individuals (Cardoso and Thompson, 2010). The strikingly substantial increased risk of discrimination associated with greater income level extends the findings of previous studies showing an association between greater discrimination and increases in income (Colen et al., 2018). This suggests that potential benefits of the SES gradient derived from greater income and education status may not be uniformly protective against social stressors, such as discrimination. Taken together, the covariate data suggest that similar future studies should carefully consider social and temporal based characteristics of study populations to explore their potential effects between stress-related gene expression and discrimination.

Some limitations need to be taken into consideration while interpreting the results of this study. First, we focused on key CpGs to avoid the potential impact of multiple analyses. However, there are many other CpG sites and combinations that could be explored. Second, we analyzed methylation within peripheral cell samples. We must consider that blood is heterogeneous, which may account for some of

Santos Jr, Hudson

the variability in methylation and may introduce a confound where other variables are associated with cellular heterogeneity. Third, while studies combining methylation in blood and post mortem brain suggest that they are often substantially correlated (Tylee et al., 2013), it cannot be assumed that DNA methylation in peripheral tissues reflects methylation in relevant central nervous system regions. This is particularly a concern due to substantial variations in epigenetic effects across brain regions and cell types. Fourth, we used a self-reported measure of daily discrimination, thus introducing the risk of report bias. The EDS assesses discrimination across several domains, without specific reference to race, ethnicity or other demographic characteristics. This feature of the EDS allows it to be used across populations of different racial/ethnic backgrounds and also allows us to tap into the subjective experience of perceived discrimination (Lewis et al., 2012). Our data collection was completed between May 2016 to March 2017, which overlaps with the 2016 US presidential election in which Latin American immigration to the US emerged as one of the most politicized and polemical topics on the campaign trail. Thus, it is possible that the reports obtained from our assessments, especially at T2 (post-election), were affected by the increased self-awareness and self-protection of Latinos within our communities, which could explain the small decrease in EDS report from T1 to T2. Answering reports based on social desirability prevents the participants from increasing their interaction with the research team and related health care providers (Hopwood et al., 2009). In this sense, the EDS scores reported in this report are likely a significant underestimation of the actual experience of this population. Future studies should consider using multiple data collection methods to capture the complex nature of discrimination in an individual's life and the effect of the current US political situation and social desirability on their approach to self-report social and health-related information.

In summary, our findings indicate that discrimination exposure is specifically related to modification of genetic factors strongly linked to the etiology of stress-related disorders, such as depression, anxiety, and post-traumatic stress, which substantially and disproportionately affect Latino communities. There were differences in methylation patterns within and across genes, emphasizing the importance of specificity in methylation patterns among CpG sites and reinforcing the call for studies to

Santos Jr, Hudson

target CpG sites within biologically relevant areas, such as transcription factor binding regions and non-coding first exons of the *NR3C1* gene . In addition, expression studies need to be performed in order to determine functional repercussions of CpG methylation. These results warrant further investigation to better understand the genetic and psychopathological impact of discrimination on Latino mothers and their families.

**Table 1**

Primer sequences, locations and sequences of regions targeted by bisulphite pyrosequencing.

| <b>Gene</b><br><b>(location, hg19)</b>           | <b>Primers; Forward, Reverse, Sequencing.</b><br><b>*Biotinylation</b>                                   | <b>PCR Conditions</b>                                | <b>Sequence analyzed (CpGs numbered) 5'--3'</b>                                                                                                           |
|--------------------------------------------------|----------------------------------------------------------------------------------------------------------|------------------------------------------------------|-----------------------------------------------------------------------------------------------------------------------------------------------------------|
| <i>NR3C1</i><br>chr5:143,404,044-<br>143,404,076 | F-(Biotin) AATTTTTTAGGAAAAGGGTGG<br>R-AACCCCTTTCCAAATAACACACTTC<br>S-AACTCCCAATAAATCTAAAAC               | 94°C, 1 min;<br>60°C, 1 min; 72°C<br>1min. 50 cycles | CR(CpG1)CR(CpG2)AAACTAAACR(CpG3)A<br>AAACR(CpG4)AAAAAAAAATAAC                                                                                             |
| <i>BDNF</i><br>chr11:27,701,578-<br>27,701,672   | F-GATTTTGGTAATTCGTGTATTAGAGTGTT<br>R- (Biotin) AGATTAAATGGAGTTTTCGTTGAT<br>S- AATGGAGTTTTCGTTGATGGGGTGCA | 94°C, 1 min;<br>56°C, 1 min; 72°C<br>1min. 50 cycles | Y(CpG1)GTAY(CpG2)GTTAAGGTATY(CpG3)<br>)GTGGAGTTTTTY(CpG4)GTGGATTTTAT<br>TTATTTTTTTATTTATY(CpG5)GY(CpG6)GG<br>AGAGGGTTGTTTTY(CpG7)GTTGTYGTTTT<br>TTTTYGGYG |
| <i>FKBP5</i><br>Chr6: 35,558,486-<br>35,558,567  | F-GGATTTGTAGTTGGGATAATAATTTGG<br>R-(Biotin) TCTTACCTCCAACACTACTACTAAAA<br>S-GGAGTTATAGTGAGGTTT           | 94°C, 1 min;<br>60°C, 1 min; 72°C<br>1min. 50 cycles | TTY(CpG1)GTGATTTTTGTGAAGGGTATA<br>ATTY(CpG2)GTTTAGTTTTGAAAAG                                                                                              |

Santos Jr, Hudson

**Table 2**

Baseline characteristics of the cohort (n = 147).

---

|                                         |              |
|-----------------------------------------|--------------|
| <b>Age, years</b>                       |              |
| Mean (SD)                               | 27.6 (6.35)  |
| <b>Marital status</b>                   |              |
| Married                                 | 34.7%        |
| Not married but living with partner     | 39.5%        |
| Single                                  | 25.8%        |
| <b>Education</b>                        |              |
| High school or less                     | 85.0%        |
| Some college                            | 8.2%         |
| Other                                   | 6.8%         |
| <b>Household income (Yearly)</b>        |              |
| < \$25,000                              | 79.6%        |
| \$25,000 – 39,999                       | 19.7%        |
| > \$40,000                              | 0.7%         |
| <b>Ethnicity</b>                        |              |
| Non-US born                             | 83.7%        |
| US-born                                 | 16.3%        |
| <b>Years living in US</b>               |              |
| Mean (SD)                               | 12.0 (7.27)  |
| <b>Sex of the infant</b>                |              |
| Male                                    | 46.3%        |
| Female                                  | 53.7%        |
| <b>Depression Symptoms (IDAS-GD T1)</b> |              |
| Mean (SD)                               | 30.77 (6.31) |
| <b>Depression Symptoms (IDAS-GD T2)</b> |              |
| Mean (SD)                               | 29.87 (7.20) |

---

**Table 3**

Response Frequencies and Mean Scores for Items on the Everyday Discrimination Scale (EDS).

| Everyday Perceived<br>Discrimination (EDS)            | Mean Score <sup>1</sup> (SD) |             | Response Frequency, % |     |                         |     |                        |     |                       |     |                          |     |      |      |     |       |
|-------------------------------------------------------|------------------------------|-------------|-----------------------|-----|-------------------------|-----|------------------------|-----|-----------------------|-----|--------------------------|-----|------|------|-----|-------|
|                                                       | T1 (n=150)                   | T2 (n=142)  | Almost<br>everyday    | 0.0 | At least once a<br>week | 0.0 | A few times a<br>month | 0.0 | A few times a<br>year | 0.0 | Less than once<br>a year | 0.0 | 0.0  | 0.0  | 0.0 | Never |
| <b>EDS total score</b>                                | 0.34 (0.56)                  | 0.22 (0.46) |                       |     |                         |     |                        |     |                       |     |                          |     |      |      |     |       |
| <b>EDS items</b>                                      |                              |             |                       |     |                         |     |                        |     |                       |     |                          |     |      |      |     |       |
| 1. Treated with less courtesy                         | 0.62 (1.11)                  | 0.43 (0.92) | 0.7                   | 0.0 | 2.0                     | 0.7 | 7.9                    | 5.7 | 6.6                   | 8.5 | 13.9                     | 6.4 | 68.9 | 78.7 |     |       |
| 2. Treated with less respect                          | 0.46 (0.96)                  | 0.32 (0.8)  | 0.0                   | 0.0 | 2.6                     | 0.0 | 4.0                    | 4.2 | 5.3                   | 8.5 | 12.6                     | 2.1 | 75.5 | 85.2 |     |       |
| 3. Receive poorer service at<br>restaurants or stores | 0.45 (0.92)                  | 0.31 (0.71) | 0.0                   | 0.0 | 2.0                     | 0.0 | 3.3                    | 1.4 | 7.9                   | 9.9 | 11.3                     | 7.0 | 75.5 | 81.7 |     |       |
| 4. People act as if they think you<br>are not smart   | 0.46 (0.88)                  | 0.25 (0.74) | 0.0                   | 0.7 | 0.0                     | 0.0 | 6.0                    | 1.4 | 8.6                   | 6.3 | 10.6                     | 4.9 | 74.8 | 86.6 |     |       |
| 5. People act as if they are afraid of<br>you         | 0.09 (0.48)                  | 0.08 (0.4)  | 0.0                   | 0.0 | 0.7                     | 0.0 | 0.7                    | 0.7 | 1.3                   | 2.1 | 2.0                      | 1.4 | 95.4 | 95.8 |     |       |
| 6. People act as if they think you<br>are dishonest   | 0.15 (0.51)                  | 0.1 (0.36)  | 0.0                   | 0.0 | 0.0                     | 0.0 | 0.7                    | 0.0 | 4.6                   | 2.1 | 4.0                      | 5.6 | 90.7 | 92.3 |     |       |
| 7. People act as if they are better<br>than you       | 0.62 (1.15)                  | 0.3 (0.73)  | 1.3                   | 0.0 | 2.0                     | 0.0 | 6.0                    | 2.8 | 10.6                  | 7.7 | 8.6                      | 6.3 | 71.5 | 83.1 |     |       |

Santos Jr, Hudson

|                                     |             |             |     |     |     |     |     |     |     |     |     |     |      |      |
|-------------------------------------|-------------|-------------|-----|-----|-----|-----|-----|-----|-----|-----|-----|-----|------|------|
| 8. You are called names or insulted | 0.19 (0.62) | 0.11 (0.41) | 0.0 | 0.0 | 0.7 | 0.0 | 1.3 | 0.0 | 3.3 | 3.5 | 5.3 | 4.2 | 89.4 | 92.3 |
| 9. You are threatened or harassed   | 0.03 (0.2)  | 0.04 (0.22) | 0.0 | 0.0 | 0.0 | 0.0 | 0.0 | 0.0 | 0.7 | 0.7 | 1.3 | 2.1 | 98.0 | 97.2 |

**Main reported reasons for discrimination (T1 and T2 %)**

| Ancestry |      | Gender |     | Race |      | Age |     | Religion |     | Height |     | Weight |     | Other physical appearance |     | Sexual orientation |     | Education or Income Level |     | Other |     |
|----------|------|--------|-----|------|------|-----|-----|----------|-----|--------|-----|--------|-----|---------------------------|-----|--------------------|-----|---------------------------|-----|-------|-----|
| 14.6     | 11.3 | 3.3    | 2.0 | 21.2 | 13.9 | 6.6 | 4.0 | 2.0      | 2.6 | 2.6    | 2.6 | 5.3    | 3.3 | 2.6                       | 1.3 | 0.7                | 1.3 | 6.0                       | 6.0 | 3.3   | 3.3 |

<sup>1</sup> Possible range: 1 to 5; higher scores indicate higher reports of everyday discrimination.

**Table 4**

Estimated risk ratios between baseline (T1) and follow-up (T2) EDS and methylation at various CpG sites, controlled for demographic and mood symptom variables. P-values are from partial Wald-type added-last tests of regression coefficients and adjusted for multiple comparisons post-hoc via the Benjamini-Hochberg procedure, controlling for a 5% FDR. McFadden pseudo-R<sup>2</sup> are provided for model fit.

| Gene         | CpG Site | Genome location (hg38) | EDS at T1           |                   |                       | EDS at T2           |                 |                       |
|--------------|----------|------------------------|---------------------|-------------------|-----------------------|---------------------|-----------------|-----------------------|
|              |          |                        | Risk Ratio (95% CI) | <i>p</i> -value   | Pseudo-R <sup>2</sup> | Risk Ratio (95% CI) | <i>p</i> -value | Pseudo-R <sup>2</sup> |
| <i>NR3C1</i> | Site 1   | chr5:143,404,073       | 0.85 (0.768,0.947)  | <b>0.008</b>      | 0.170                 | 0.98 (0.826,1.154)  | 0.891           | 0.145                 |
|              | Site 2   | chr5:143,404,071       | 0.84 (0.752,0.931)  | <b>0.004</b>      | 0.174                 | 0.84 (0.741,0.948)  | <b>0.025</b>    | 0.167                 |
|              | Site 3   | chr5:143,404,061       | 0.92 (0.848,1.002)  | 0.110             | 0.162                 | 0.71 (0.471,1.066)  | 0.234           | 0.187                 |
|              | Site 4   | chr5:143,404,056       | 0.95 (0.867,1.034)  | 0.308             | 0.158                 | 0.93 (0.794,1.080)  | 0.442           | 0.148                 |
| <i>BDNF</i>  | Site 1   | chr11:27,701,672       | 1.03 (0.982,1.073)  | 0.308             | 0.158                 | 1.00 (0.886,1.140)  | 0.937           | 0.144                 |
|              | Site 2   | chr11:27,701,668       | 1.02 (0.974,1.063)  | 0.477             | 0.156                 | 1.05 (0.988,1.118)  | 0.234           | 0.151                 |
|              | Site 3   | chr11:27,701,657       | 0.91 (0.822,1.008)  | 0.123             | 0.161                 | 0.88 (0.744,1.035)  | 0.234           | 0.151                 |
|              | Site 4   | chr11:27,701,644       | 0.96 (0.931,0.996)  | 0.065             | 0.163                 | 0.98 (0.938,1.026)  | 0.503           | 0.147                 |
|              | Site 5   | chr11:27,701,616       | 0.96 (0.882,1.042)  | 0.376             | 0.157                 | 0.86 (0.763,0.958)  | <b>0.025</b>    | 0.161                 |
|              | Site 6   | chr11:27,701,612       | 0.86 (0.793,0.939)  | <b>0.004</b>      | 0.176                 | 0.89 (0.819,0.962)  | <b>0.025</b>    | 0.167                 |
|              | Site 7   | chr11:27,701,597       | 0.92 (0.880,0.967)  | <b>0.004</b>      | 0.175                 | 0.92 (0.880,0.971)  | <b>0.025</b>    | 0.169                 |
| <i>FKBP5</i> | Site 1   | chr6:35,558,566        | 0.85 (0.787,0.919)  | <b>&lt; 0.001</b> | 0.180                 | 0.97 (0.907,1.031)  | 0.442           | 0.147                 |
|              | Site 2   | chr6:35,558,514        | 0.98 (0.945,1.012)  | 0.305             | 0.158                 | 0.96 (0.893,1.025)  | 0.354           | 0.148                 |

Santos Jr, Hudson

## References

- Almeida, J., Biello, K.B., Pedraza, F., Wintner, S., Viruell-Fuentes, E., 2016. The association between anti-immigrant policies and perceived discrimination among Latinos in the US: A multilevel analysis. *SSM - Population Health* 2, 897-903.
- Alt, S.R., Turner, J.D., Klok, M.D., Meijer, O.C., Lakke, E.A., Derijk, R.H., Muller, C.P., 2010. Differential expression of glucocorticoid receptor transcripts in major depressive disorder is not epigenetically programmed. *Psychoneuroendocrinology* 35, 544-556.
- Askenasy, J.-J., Lehmann, J., 2013. Consciousness, brain, neuroplasticity. *Frontiers in Psychology* 4.
- Ayón, C., 2015. Economic, Social, and Health Effects of Discrimination on Latino Immigrant Families. Migration Policy Institute, Washington, DC.
- Berger, M., Sarnyai, Z., 2015. "More than skin deep": stress neurobiology and mental health consequences of racial discrimination. *Stress (Amsterdam, Netherlands)* 18, 1-10.
- Cardoso, J.B., Thompson, S., 2010. Common Themes of Resilience Among Latino Immigrant Families: A Systematic Review of the Literature. *Families in Society: The Journal of Contemporary Social Services* 91, 257-265.
- Carter, R.T., Lau, M.Y., Johnson, V., Kirkinis, K., 2017. Racial Discrimination and Health Outcomes Among Racial/Ethnic Minorities: A Meta-Analytic Review. *Journal of Multicultural Counseling and Development* 45, 232-259.
- Colen, C.G., Ramey, D.M., Cooksey, E.C., Williams, D.R., 2018. Racial disparities in health among nonpoor African Americans and Hispanics: The role of acute and chronic discrimination. *Social Science & Medicine* 199, 167-180.
- National Research Council, 2004. *Measuring Racial Discrimination*. The National Academies Press, Washington, DC.
- Dammann, G., Teschler, S., Haag, T., Altmuller, F., Tuczek, F., Dammann, R.H., 2011. Increased DNA methylation of neuropsychiatric genes occurs in borderline personality disorder. *Epigenetics* 6, 1454-1462.
- Deitch, E.A., Barsky, A., Butz, R.M., Chan, S., Brief, A.P., Bradley, J.C., 2003. Subtle Yet Significant: The Existence and Impact of Everyday Racial Discrimination in the Workplace. *Human Relations* 56, 1299-1324.
- Glynn, L.M., Davis, E.P., Sandman, C.A., 2013. New insights into the role of perinatal HPA-axis dysregulation in postpartum depression. *Neuropeptides* 47, 363-370.
- Guintivano, J., Sullivan, P.F., Stuebe, A.M., Penders, T., Thorp, J., Rubinow, D.R., Meltzer-Brody, S., 2017. Adverse life events, psychiatric history, and biological predictors of postpartum depression in an ethnically diverse sample of postpartum women. *Psychological medicine*, 1-14.
- Halbreich, U., Karkun, S., 2006. Cross-cultural and social diversity of prevalence of postpartum depression and depressive symptoms. *J Affect Disord* 91, 97-111.
- NPR, Foundation, R.W.J., Harvard, T.H. Chan School of Public Health, 2017. *Discrimination in America: Experiences and Views of Latinos*.
- Herman, J.P., McKlveen, J.M., Solomon, M.B., Carvalho-Netto, E., Myers, B., 2012. Neural regulation of the stress response: glucocorticoid feedback mechanisms. *Brazilian Journal of Medical and Biological Research* 45, 292-298.
- Hopwood, C.J., Flato, C.G., Ambwani, S., Garland, B.H., Morey, L.C., 2009. A comparison of Latino and Anglo socially desirable responding. *J Clin Psychol* 65, 769-780.
- Krieger, N., Smith, K., Naishadham, D., Hartman, C., Barbeau, E.M., 2005. Experiences of discrimination: validity and reliability of a self-report measure for population health research on racism and health. *Social science & medicine* (1982) 61, 1576-1596.

Santos Jr, Hudson

Lambert, D., 1992. Zero-Inflated Poisson Regression, with an Application to Defects in Manufacturing. *Technometrics* 34, 1-14.

Lara-Cinisomo, S., Grewen, K.M., Girdler, S.S., Wood, J., Meltzer-Brody, S., 2017. Perinatal Depression, Adverse Life Events, and Hypothalamic–Adrenal–Pituitary Axis Response to Cold Pressor Stress in Latinas: An Exploratory Study. *Women's Health Issues* 27, 673–682.

Lee, D.L., Ahn, S., 2012. Discrimination Against Latina/os: A Meta-Analysis of Individual-Level Resources and Outcomes. *The Counseling Psychologist* 40, 28-65.

Lewis, T.T., Yang, F.M., Jacobs, E.A., Fitchett, G., 2012. Racial/Ethnic Differences in Responses to the Everyday Discrimination Scale: A Differential Item Functioning Analysis. *American Journal of Epidemiology* 175, 391-401.

Liu, C.H., Tronick, E., 2014. Prevalence and predictors of maternal postpartum depressed mood and anhedonia by race and ethnicity. *Epidemiology and psychiatric sciences* 23, 201-209.

Mendoza, V.B.d., Huang, Y., Crusto, C.A., Sun, Y.V., Taylor, J.Y., 2018. Perceived Racial Discrimination and DNA Methylation Among African American Women in the InterGEN Study. *Biological Research For Nursing* 20, 145-152.

Mitchell, C., Schneper, L.M., Notterman, D.A., 2016. DNA methylation, early life environment, and health outcomes. *Pediatric research* 79, 212-219.

Mitchelmore, C., Gede, L., 2014. Brain derived neurotrophic factor: Epigenetic regulation in psychiatric disorders. *Brain Research* 1586, 162-172.

Murgatroyd, C., Quinn, J.P., Sharp, H.M., Pickles, A., Hill, J., 2015. Effects of prenatal and postnatal depression, and maternal stroking, at the glucocorticoid receptor gene. *Transl Psychiatry* 5, e560.

Numakawa, T., Odaka, H., Adachi, N., 2017. Actions of Brain-Derived Neurotrophic Factor and Glucocorticoid Stress in Neurogenesis. *International Journal of Molecular Sciences* 18, 2312.

Palma-Gudiel, H., Cordova-Palomera, A., Leza, J.C., Fananas, L., 2015. Glucocorticoid receptor gene (NR3C1) methylation processes as mediators of early adversity in stress-related disorders causality: A critical review. *Neurosci Biobehav Rev* 55, 520-535.

Paquette, A.G., Lester, B.M., Koestler, D.C., Lesseur, C., Armstrong, D.A., Marsit, C.J., 2014. Placental FKBP5 genetic and epigenetic variation is associated with infant neurobehavioral outcomes in the RICHS cohort. *PLoS One* 9, e104913.

Perroud, N., Salzmann, A., Prada, P., Nicastro, R., Hoeppli, M.E., Furrer, S., Ardu, S., Krejci, I., Karege, F., Malafosse, A., 2013. Response to psychotherapy in borderline personality disorder and methylation status of the BDNF gene. *Translational Psychiatry* 3, e207.

Romens, S.E., McDonald, J., Svaren, J., Pollak, S.D., 2015. Associations between early life stress and gene methylation in children. *Child Dev* 86, 303-309.

Schiller, C.E., O'Hara, M.W., Rubinow, D.R., Johnson, A.K., 2013. Estradiol modulates anhedonia and behavioral despair in rats and negative affect in a subgroup of women at high risk for postpartum depression. *Physiology & behavior* 119, 137-144.

Segre, L.S., Brock, R.L., O'Hara, M.W., 2015. Depression Treatment for Impoverished Mothers by Point-of-Care Providers: A Randomized Controlled Trial. *Journal of consulting and clinical psychology* 83, 314-324.

Steiger, H., Labonte, B., Groleau, P., Turecki, G., Israel, M., 2013. Methylation of the glucocorticoid receptor gene promoter in bulimic women: associations with borderline personality disorder, suicidality, and exposure to childhood abuse. *The International journal of eating disorders* 46, 246-255.

Szyf, M., 2013. Social Environment and DNA Methylation: A Mechanism for Linking Nurture and Nature, in: Jirtle, R.L., Tyson, F.L. (Eds.), *Environmental Epigenomics in Health and Disease: Epigenetics and Complex Diseases*. Springer Berlin Heidelberg, Berlin, Heidelberg, pp. 21-35.

Turecki, G., Meaney, M., 2016. Effects of the social environment and stress on glucocorticoid receptor gene methylation: a systematic review. *Biological psychiatry* 79, 87-96.

Santos Jr, Hudson

- Tylee, D.S., Kawaguchi, D.M., Glatt, S.J., 2013. On the outside, looking in: a review and evaluation of the comparability of blood and brain "-omes". *American journal of medical genetics. Part B, Neuropsychiatric genetics : the official publication of the International Society of Psychiatric Genetics* 162b, 595-603.
- Vuong, Q.H., 1989. Likelihood Ratio Tests for Model Selection and Non-Nested Hypotheses. *Econometrica* 57, 307-333.
- Wallace, S., Nazroo, J., Becares, L., 2016. Cumulative Effect of Racial Discrimination on the Mental Health of Ethnic Minorities in the United Kingdom. *Am J Public Health* 106, 1294-1300.
- Watson, D., O'Hara, M.W., Naragon-Gainey, K., Koffel, E., Chmielewski, M., Kotov, R., Stasik, S.M., Ruggero, C.J., 2012. Development and validation of new anxiety and bipolar symptom scales for an expanded version of the IDAS (the IDAS-II). *Assessment* 19, 399-420.
- White, I.R., Royston, P., Wood, A.M., 2011. Multiple imputation using chained equations: Issues and guidance for practice. *Statistics in Medicine* 30, 377-399.
- Williams, D.R., Mohammed, S.A., 2009. Discrimination and racial disparities in health: evidence and needed research. *Journal of behavioral medicine* 32, 20.
- Williams, D.R., Yan Yu, Jackson, J.S., Anderson, N.B., 1997. Racial Differences in Physical and Mental Health: Socio-economic Status, Stress and Discrimination. *J Health Psychol* 2, 335-351.
- Yehuda, R., Daskalakis, N.P., Desarnaud, F., Makotkine, I., Lehrner, A.L., Koch, E., Flory, J.D., Buxbaum, J.D., Meaney, M.J., Bierer, L.M., 2013. Epigenetic Biomarkers as Predictors and Correlates of Symptom Improvement Following Psychotherapy in Combat Veterans with PTSD. *Front Psychiatry* 4, 118.
- Yehuda, R., Daskalakis, N.P., Lehrner, A., Desarnaud, F., Bader, H.N., Makotkine, I., Flory, J.D., Bierer, L.M., Meaney, M.J., 2014. Influences of maternal and paternal PTSD on epigenetic regulation of the glucocorticoid receptor gene in Holocaust survivor offspring. *Am J Psychiatry* 171, 872-880.
- Yehuda, R., Flory, J.D., Bierer, L.M., Henn-Haase, C., Lehrner, A., Desarnaud, F., Makotkine, I., Daskalakis, N.P., Marmar, C.R., Meaney, M.J., 2015. Lower methylation of glucocorticoid receptor gene promoter 1F in peripheral blood of veterans with posttraumatic stress disorder. *Biol Psychiatry* 77, 356-364.
- Yildiz, P.D., Ayers, S., Phillips, L., 2017. The prevalence of posttraumatic stress disorder in pregnancy and after birth: A systematic review and meta-analysis. *J Affect Disord* 208, 634-645.
- Zannas, A.S., Wiechmann, T., Gassen, N.C., Binder, E.B., 2015. Gene–Stress–Epigenetic Regulation of FKBP5: Clinical and Translational Implications. *Neuropsychopharmacology* 41, 261.
- Zhang, L., Li, X.X., Hu, X.Z., 2016. Post-traumatic stress disorder risk and brain-derived neurotrophic factor Val66Met. *World J Psychiatry* 6, 1-6.
